# Supplementary material for: NLRC3 Delays the Progression of AD in APP/PS1 Mice via Inhibiting PI3K Activation
Source: PubMed Central journal article supplement (PMC7775163; doi:10.1155/2020/5328031), 2020-12-24
Supplement: 5328031.f1.pdf [file 5328031.f1.pdf]

APP

377bp

PS1

608bp

APP/PS1

APP/PS1

APP/PS1

APP/PS1

APP/PS1
